# Supplementary figures and images for: NUDT21-spanning CNVs lead to neuropsychiatric disease and altered MeCP2 abundance via alternative polyadenylation
Source: eLife journal article supplement (doi:10.7554/elife.10782), 2015-08-27

**Figure 3\_Supplemental 2\_Gennarino**

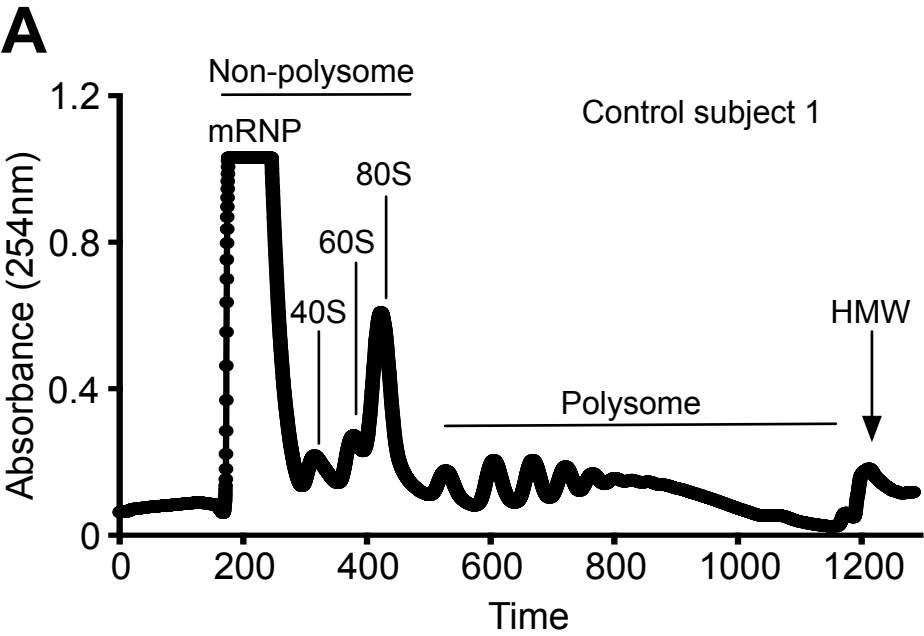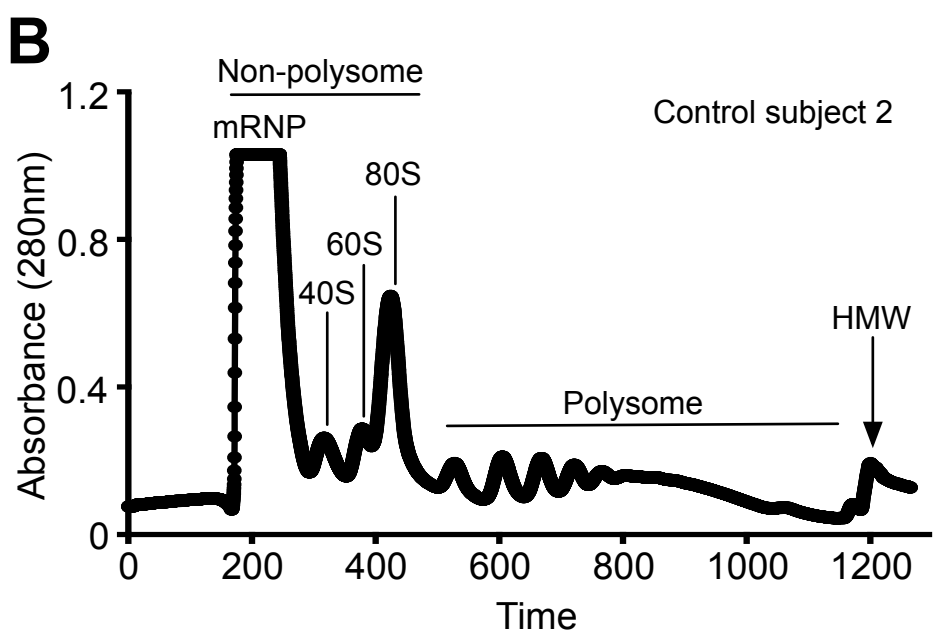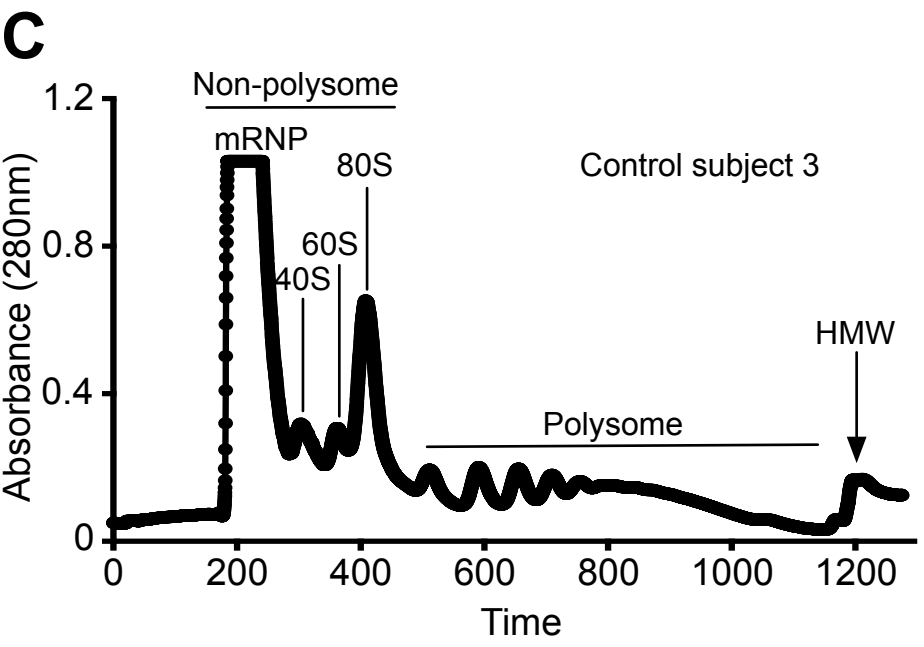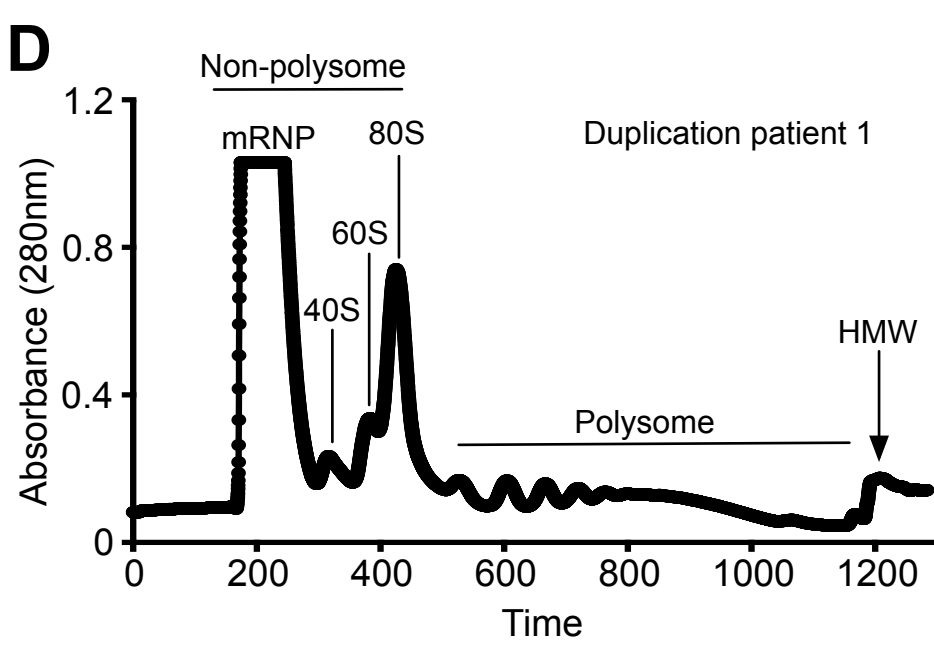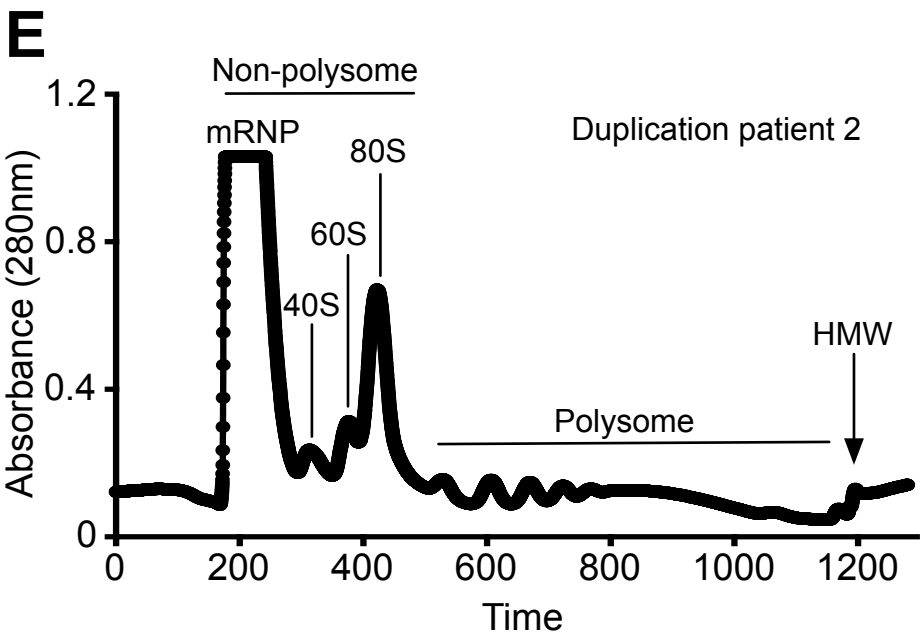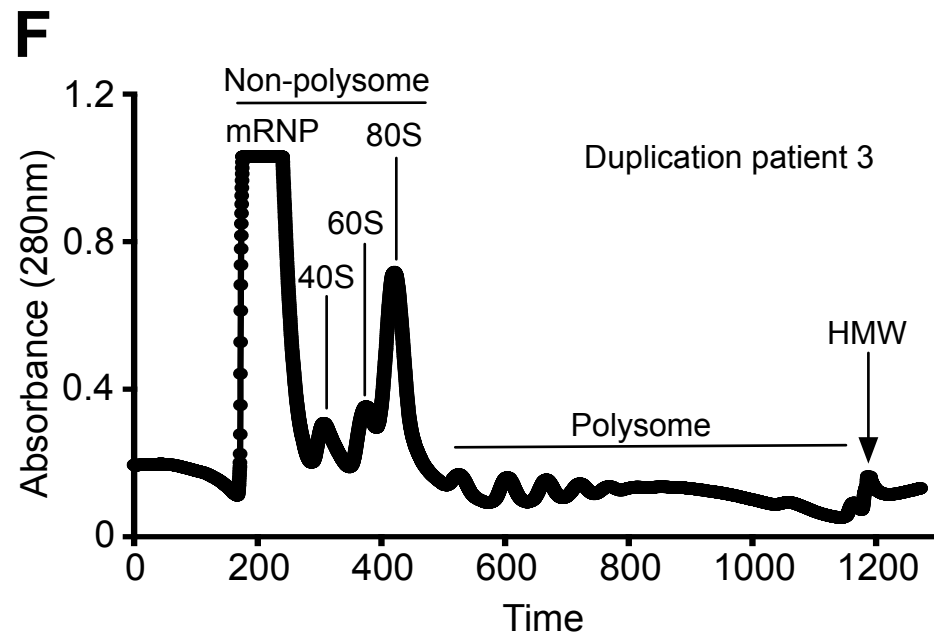

Supplement: supp [file elife-10782-supp-v1.zip]

Figure 3\_Supplemental 1\_Gennarino

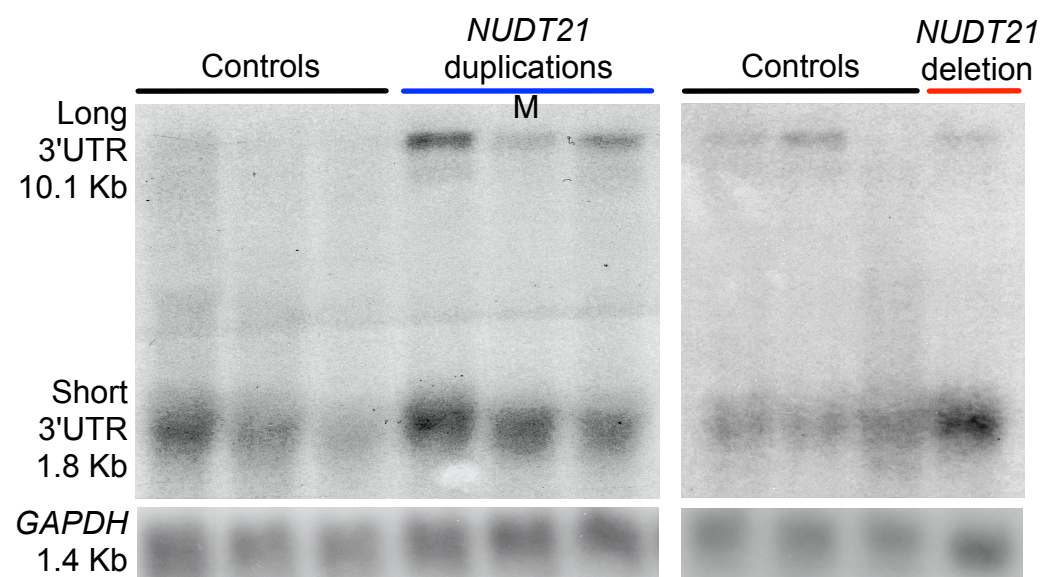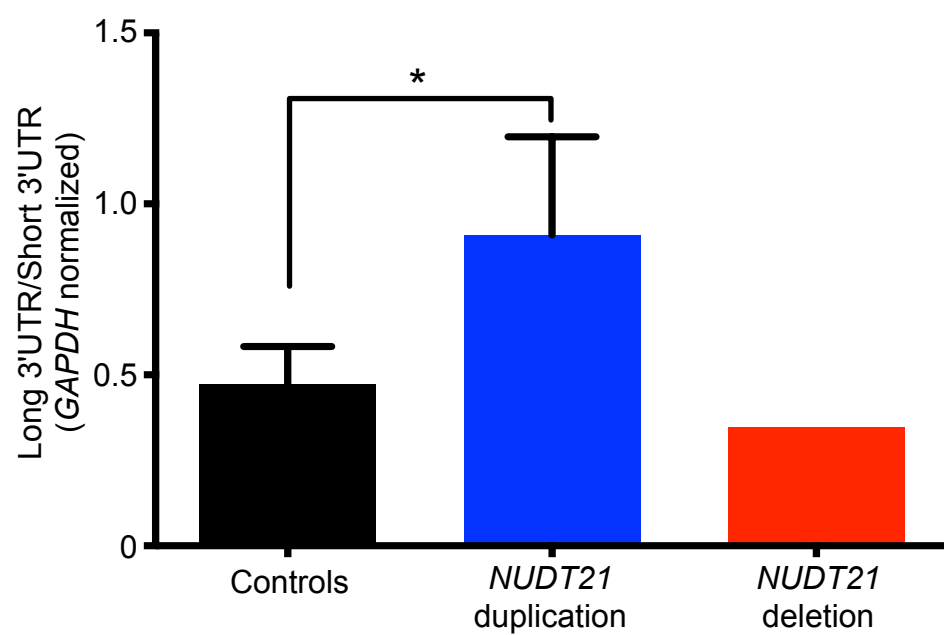

Supplement: supp [file elife-10782-supp-v1.zip]

**Figure 2\_Supplemental 1\_Gennarino**

**A**

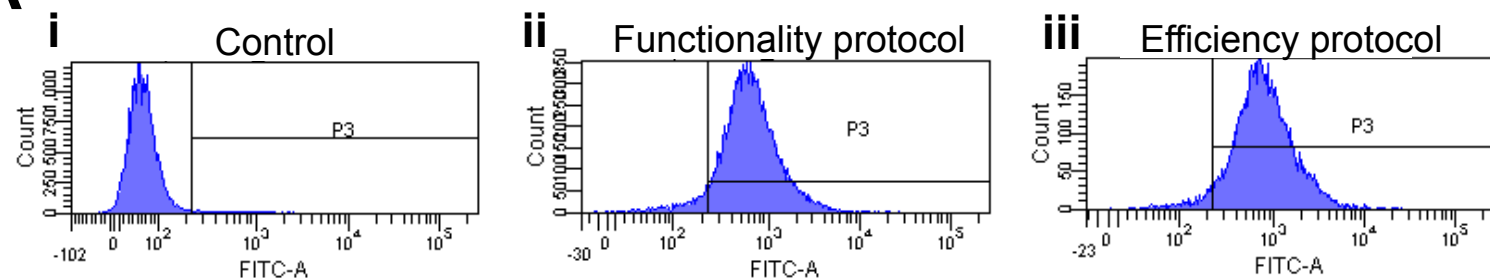

**B**

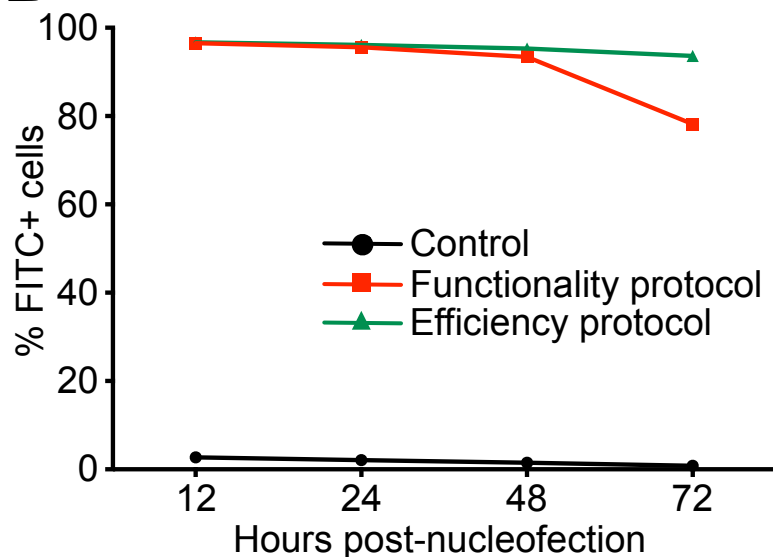

**C**

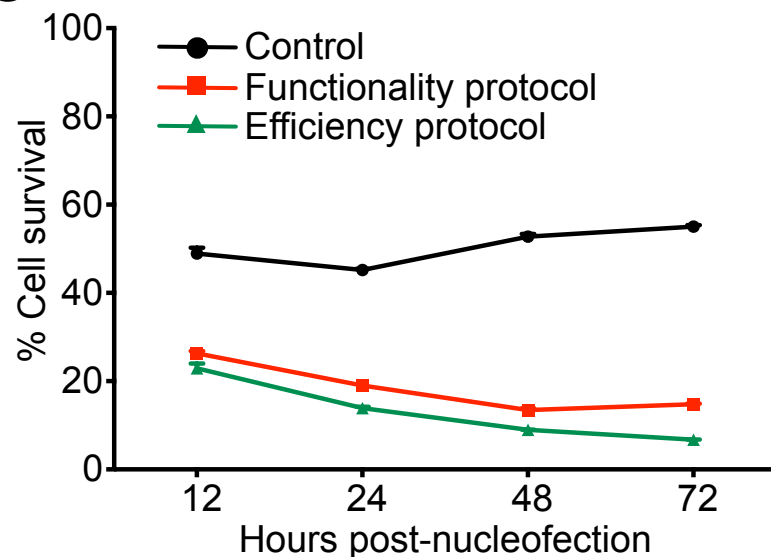

Supplement: supp [file elife-10782-supp-v1.zip]
